# Supplementary material for: In situ formed amorphous carbon-coated LiMn2O4 cathode with long-term stability for lithium-ion batteries
Source: Royal Society of Chemistry journal article supplement (doi:10.1039/d6ra02942f), 2026-05-20
Supplement: d6ra02942f1.pdf [file d6ra02942f1.pdf]

## Supporting Information

### **In-Situ Formed Amorphous Carbon-Coated LiMn<sub>2</sub>O<sub>4</sub> Cathode with Long-Term Stability for Lithium-Ion Batteries**

Wangqiong Xu, <sup>\*a</sup> Xianrong Li, <sup>a</sup> Xueqing Kang, <sup>c</sup> Lijuan Chen, <sup>a</sup> Baiyan Guo, <sup>a</sup> Qiling Li, <sup>\*b</sup> Kun Xu, <sup>a</sup>

Yiming Cao, <sup>a</sup> Zhe Li, <sup>a</sup> Yongsheng Liu, <sup>\*c</sup>

*a. College of Physics and Electronic Engineering, Qujing Normal University, Qujing, Yunnan 655011, China.*

*b. Yunnan Key Laboratory of Crystalline Porous Organic Functional Materials, College of Chemistry and Environmental Science,*

*Qujing Normal University, Qujing, Yunnan 655011, China.*

*c. Department of Physics, Shanghai University of Electric Power, Shanghai 200090, China.*

\*Corresponding authors: xuwangqiong@mail.qjnu.edu.cn (W.Q. Xu), 839634719@qq.com (Q.L. Li),

ysliu@shiep.edu.cn (Y.S. Liu)

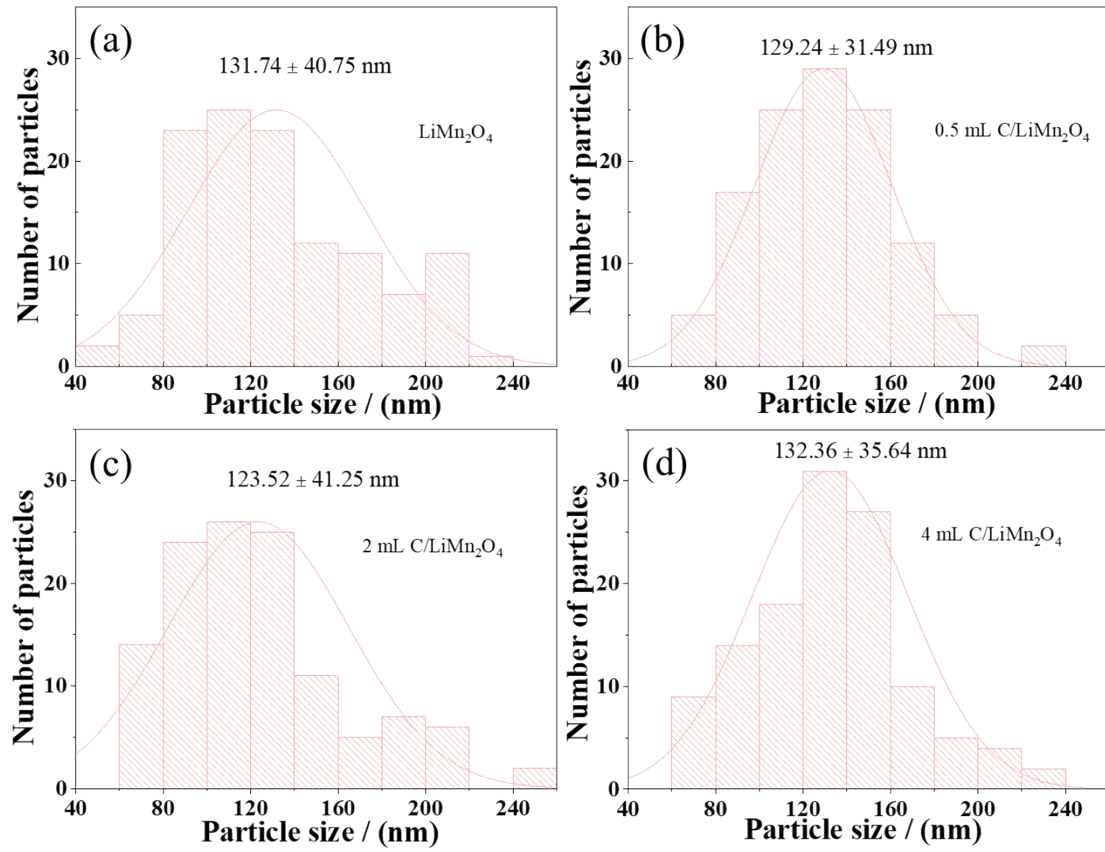

Fig. S1. (a-d) Particle size distribution of  $\text{LiMn}_2\text{O}_4$  and carbon-coated  $\text{LiMn}_2\text{O}_4$  with different NMP contents.

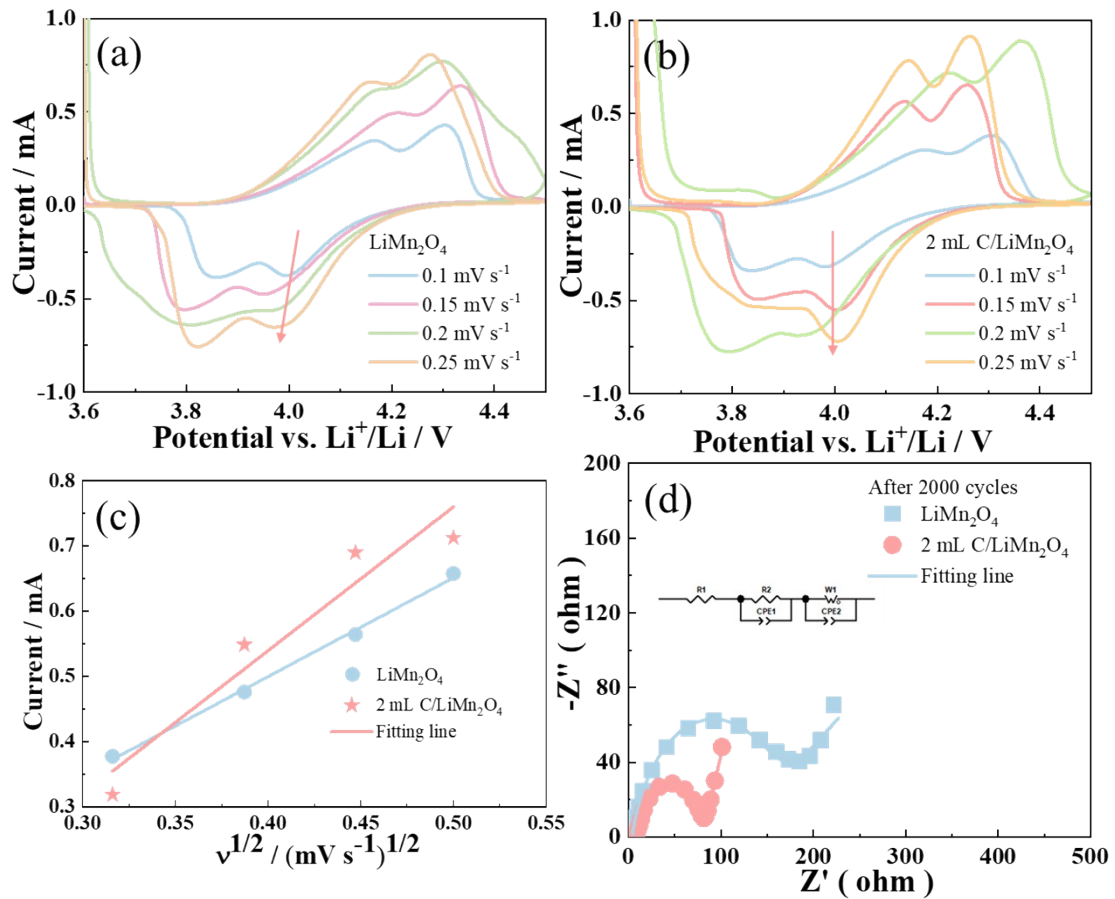

**Fig. S2.** CV curves of the (a) bare LiMn<sub>2</sub>O<sub>4</sub> and (b) 2 mL C/LiMn<sub>2</sub>O<sub>4</sub> with different scan rates from 0.1 to 0.25 mV s<sup>-1</sup>; (c) The relationship of the reduction peak current at bare LiMn<sub>2</sub>O<sub>4</sub> and 2 mL C/LiMn<sub>2</sub>O<sub>4</sub> with the square root of scan rate. (d) EIS plots of bare LiMn<sub>2</sub>O<sub>4</sub> and 2 mL C/LiMn<sub>2</sub>O<sub>4</sub> after 2000 cycles, and the inset shows the equivalent circuits.

**Table S1** Mn 2p<sub>3/2</sub> peak parameters for Mn in the LiMn<sub>2</sub>O<sub>4</sub> sample.

| Peak                           | B.E. (eV) | FWHM (eV) | Percent (%) |
|--------------------------------|-----------|-----------|-------------|
| Mn <sup>4+</sup> (total)=48.50 |           |           |             |
| Mn <sup>4+</sup>               | 642.06    | 0.93      | 19.58       |
| Mn <sup>4+</sup>               | 642.74    | 0.96      | 14.36       |
| Mn <sup>4+</sup>               | 643.84    | 1.00      | 9.54        |
| Mn <sup>4+</sup>               | 645.20    | 1.00      | 3.38        |
| Mn <sup>4+</sup>               | 646.17    | 1.00      | 1.64        |
| Mn <sup>3+</sup> (total)=51.50 |           |           |             |
| Mn <sup>3+</sup>               | 640.50    | 1.00      | 14.24       |
| Mn <sup>3+</sup>               | 641.30    | 0.98      | 18.84       |
| Mn <sup>3+</sup>               | 642.45    | 0.94      | 5.49        |
| Mn <sup>3+</sup>               | 643.31    | 0.90      | 8.99        |
| Mn <sup>3+</sup>               | 644.51    | 0.90      | 3.94        |

**Table S2** Mn 2p<sub>3/2</sub> peak parameters for Mn in the 2 mL C/LiMn<sub>2</sub>O<sub>4</sub> sample.

| Peak                           | B.E. (eV) | FWHM (eV) | Percent (%) |
|--------------------------------|-----------|-----------|-------------|
| Mn <sup>4+</sup> (total)=47.47 |           |           |             |
| Mn <sup>4+</sup>               | 642.12    | 0.94      | 18.36       |
| Mn <sup>4+</sup>               | 642.65    | 0.92      | 15.51       |
| Mn <sup>4+</sup>               | 643.90    | 0.98      | 8.61        |
| Mn <sup>4+</sup>               | 645.20    | 1.00      | 3.34        |
| Mn <sup>4+</sup>               | 646.10    | 1.00      | 1.65        |
| Mn <sup>3+</sup> (total)=52.54 |           |           |             |
| Mn <sup>3+</sup>               | 640.83    | 0.92      | 13.31       |
| Mn <sup>3+</sup>               | 641.47    | 1.00      | 15.95       |
| Mn <sup>3+</sup>               | 640.00    | 1.00      | 5.64        |
| Mn <sup>3+</sup>               | 643.28    | 0.99      | 13.68       |
| Mn <sup>3+</sup>               | 644.54    | 0.90      | 3.96        |

**Table S3** Impedance data of  $\text{LiMn}_2\text{O}_4$  and 2 mL C/ $\text{LiMn}_2\text{O}_4$ .

| Sample                                              | $R_1$ ( $\Omega$ ) | $R_2$ ( $\Omega$ ) |
|-----------------------------------------------------|--------------------|--------------------|
| $\text{LiMn}_2\text{O}_4$ before cycle              | 2.02               | 375.93             |
| 2 mL C/ $\text{LiMn}_2\text{O}_4$ before cycle      | 2.46               | 145.92             |
| $\text{LiMn}_2\text{O}_4$ after 2000 cycles         | 3.57               | 191.92             |
| 2 mL C/ $\text{LiMn}_2\text{O}_4$ after 2000 cycles | 8.61               | 81.80              |

The lithium-ion diffusion coefficient ( $D_{Li^+}$ ) of the  $LiMn_2O_4$  and 2 mL  $C/LiMn_2O_4$  were calculated using the Randles-

Sevick equation: <sup>1,2</sup>

$$I_p = 2.69 \times 10^5 n^{3/2} A D_{Li^+}^{1/2} C v^{1/2}$$

where  $I_p$  is the peak current in voltametric scan,  $n$  is the number of electrons transferred in a single reaction (1

for  $LiMn_2O_4$  and  $LiMn_2O_4$  based materials),  $A$  is the electrode area ( $1.26 \text{ cm}^2$ ),  $D_{Li^+}$  is the  $Li^+$  diffusion coefficients

( $\text{cm}^2 \text{ s}^{-1}$ ),  $C$  is the bulk concentration of  $Li^+$  ions ( $0.0237 \text{ mol cm}^{-3}$ ) and  $v$  represents the scan rate.

The Li<sup>+</sup> diffusion coefficient ( $D_{Li^+}$ ) can be calculated by the following equation: <sup>3</sup>

$$D_{Li^+} = R^2 T^2 / 2 A^2 n^4 F^4 C^2 \sigma^2$$

Where  $D_{Li^+}$  is the diffusion coefficient of Li<sup>+</sup> (cm<sup>2</sup> s<sup>-1</sup>), R is the gas constant (8.314 J mol<sup>-1</sup>K<sup>-1</sup>), T is the absolute temperature (298.15 K), A is the surface area of electrode (1.26 cm<sup>2</sup>), n refers to the number of electrons involved in redox reaction, F is the Faraday constant (9.65×10<sup>4</sup> C mol<sup>-1</sup>), C is the concentration of Li<sup>+</sup> in active material (0.0238 mol cm<sup>-3</sup>), and  $\sigma$  is the Warburg coefficient obtained from the slope. By linear fitting of the relationship plot Z' and the square root of the angular frequency  $\omega$  (Fig. 6d), the Warburg coefficient  $\sigma$  was obtained.

## References

- 1 K. Chudzik, M. Swietoslowski, M. Bakierska, M. Kubicka, M. Gajewska and M. Molenda, *Appl. Surf. Sci.*, 2020, **531**, 147138.
- 2 N. Xue, X. Y. Wu, H. S. Shi, Y. Y. Zhang, Y. N. Zhang, Y. J. Lv, X. S. Zhang, X. Chen, Y. Yu and W. Liu, *ACS Nano*, 2024, **18**, 33743-33753.
- 3 I. Subiyanto, W. Devina, S. Byun and H. Kim, *Inorg. Chem. Front.*, 2025, **12**, 6220-6234.
